# Supplementary material
Source: Springer Nature journal article supplement (https://www.springermedizin.de/resource/supplementary/13618_2012_49_MOESM2_ESM.pdf/9681054)
Supplement: MOESM2 [file 9681054]

**A**alveolar walls [ $\mu\text{m}$ ]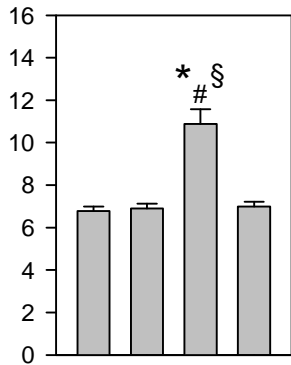

LPS

- - + +

H<sub>2</sub>S

- + - +

**B**

infiltrates [counts/HPF]

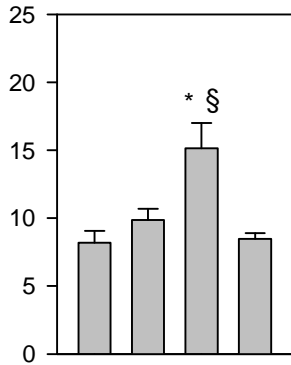

LPS

- - + +

H<sub>2</sub>S

- + - +

**C**

ALI score

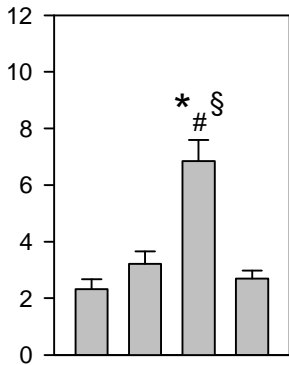

LPS

- - + +

H<sub>2</sub>S

- + - +
